# Supplementary material for: Effects of hyperoxia on vascular tone in animal models: systematic review and meta-analysis
Source: Springer Nature journal article supplement (doi:10.1186/s13054-018-2123-9), 2018-08-03
Supplement: MOESM2 [file 16001666]

**Supplemental file 2 – Quality checklist and assessment**

| Component                                                        | Comments/Clarification                                                                                                                                                                                                                                     |
|------------------------------------------------------------------|------------------------------------------------------------------------------------------------------------------------------------------------------------------------------------------------------------------------------------------------------------|
| 1. Were the assessors/data analysts blinded?                     | Yes: Blinding was performed and adequately described.<br>No: Blinding is not mentioned and/or experiments were always performed in the same order or the process was insufficiently described                                                              |
| 2. Was the preparation checked for stability and quality?        | Yes: The study included an endothelium/smooth muscle check or similar and investigated the stability of the preparation over time (if applicable)<br>No: Either checks were not described, or checks were performed, but its consequences were not defined |
| 3. Did the authors verify the intervention?                      | Yes: PO <sub>2s</sub> or P <sub>a</sub> O <sub>2s</sub> were measured and reported<br>No: Neither were measured or reported                                                                                                                                |
| 4. Did the authors verify temperatures, pH and CO <sub>2</sub> ? | Yes: Target values were provided and measured for all three properties<br>No: One or more values were not reported<br>Unclear: Target values were reported, but it was unclear whether or how they were measured                                           |
| 5. Was there no selective outcome reporting?                     | Yes: There was no indication for selective outcome reporting<br>No: An effect was described, but no data was shown                                                                                                                                         |
| 6. Were the animal characteristics properly described?           | Yes: The authors mentioned species, age/weight, gender and the number of animals used<br>No: The authors did not describe one or more of the above characteristics                                                                                         |
| 7. Were the vessels properly described?                          | Yes: The method of artery selection (e.g. order, standardized location), number of vessels per animal used and its diameter were reported<br>No: The authors did not describe the above characteristics                                                    |
| 8. Were group sized based on a power analysis?                   | Yes: A proper power analysis was described<br>No: A power analysis was not described or mentioned                                                                                                                                                          |
| 9. Is the study published in a peer reviewed journal?            | Yes/No                                                                                                                                                                                                                                                     |
| 10. Was the study approved by an ethical board?                  | Yes/No                                                                                                                                                                                                                                                     |
| 11. Is there a conflict of interest statement?                   | Yes/No                                                                                                                                                                                                                                                     |
