# Supplementary material for: Effects of hyperoxia on vascular tone in animal models: systematic review and meta-analysis
Source: Springer Nature journal article supplement (doi:10.1186/s13054-018-2123-9), 2018-08-03

Supplemental File 4 – Funnel plots

Funnel plots of In vivo studies

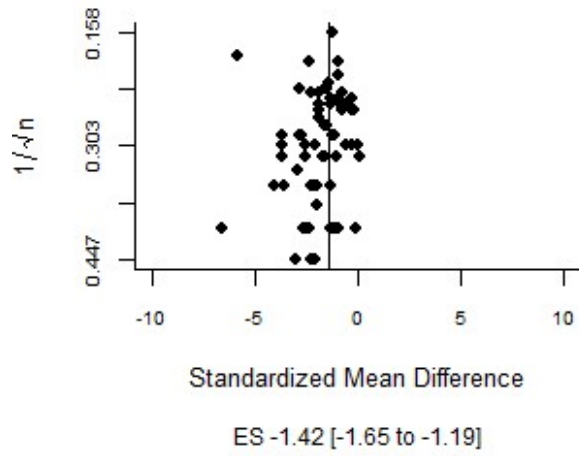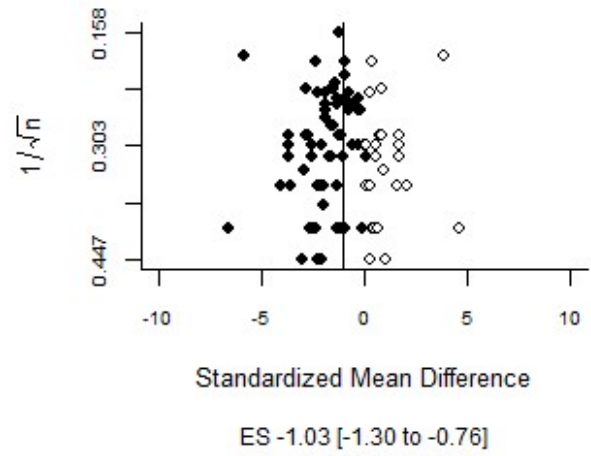

Funnel plots of ex vivo studies

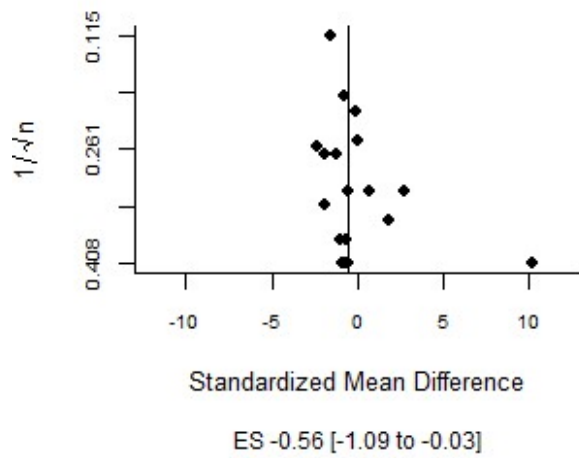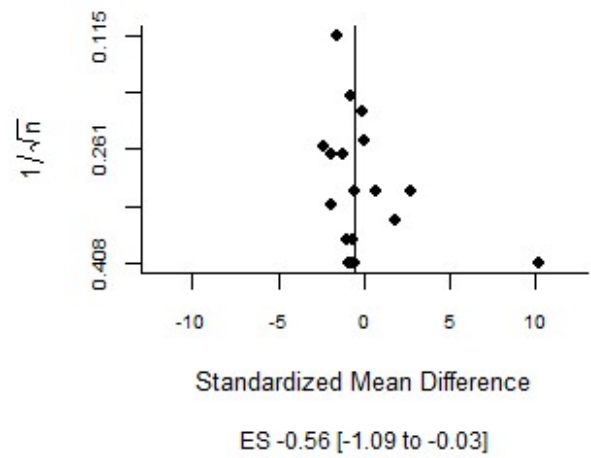

Supplement: MOESM3 [file 16001666]
