# Supplementary material for: Effects of hyperoxia on vascular tone in animal models: systematic review and meta-analysis
Source: Springer Nature journal article supplement (doi:10.1186/s13054-018-2123-9), 2018-08-03
Supplement: MOESM4 [file 16001666]

### Supplemental file 3 – Sensitivity analysis

#### Meta-analysis

The table below shows the impact of a lower and higher correlation coefficient on the overall effect size for in-vivo and isolated artery studies. A conservative correlation of 0.7 was used in the analysis presented in the manuscript.

| Correlation            | <i>In vivo</i> studies |                  | <i>Ex vivo</i> studies |                  |
|------------------------|------------------------|------------------|------------------------|------------------|
|                        | SMD                    | 95%CI            | SMD                    | 95%CI            |
| 0.5                    | -1.35                  | [-1.56 to -1.13] | -0.50                  | [-1.01 to 0.01]  |
| 0.7 (used in analysis) | -1.42                  | [-1.64 to -1.20] | -0.56                  | [-1.09 to -0.03] |
| 0.9                    | -1.58                  | [-1.83 to -1.33] | -0.69                  | [-1.30 to -0.09] |
